# Supplementary material for: Tracing North Atlantic volcanism and seaway connectivity across the Paleocene–Eocene Thermal Maximum (PETM)
Source: Copernicus journal article supplement (doi:10.5194/cp-19-1623-2023), 2023-08-08
Supplement: Supplementary file 1 [file cp-19-1623-2023-supplement.zip]

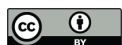

*Supplement of*

**Tracing North Atlantic volcanism and seaway connectivity  
across the Paleocene–Eocene Thermal Maximum (PETM)**

**Morgan T. Jones et al.**

*Correspondence to:* Morgan T. Jones ([m.t.jones@geo.uio.no](mailto:m.t.jones@geo.uio.no))

- [cp-19-1623-2023-supplement-title-page.pdf](#)
- [Supplementary Data - Fur paper.xlsx](#)

The copyright of individual parts of the supplement might differ from the article licence.
