# Supplementary material for: Tracing North Atlantic volcanism and seaway connectivity across the Paleocene–Eocene Thermal Maximum (PETM)
Source: Copernicus journal article supplement (doi:10.5194/cp-19-1623-2023), 2023-08-08
Supplement: Supplementary file 1 [file Supplementary Data - Fur paper.xlsx]

## Sheet: Sheet1
					Carbon and Mercury. Sources: Jones et al. (2019), Schoon et al. (2013), and this study				Paleotemperature proxies. Sources: Schoon et al. (2013), Stokke et al. (2020a), and Vickers et al. (2020)						Detrital lithium isotopes. Sources: Pogge von Strandmann et al. (2021) and this study		Rhenium and osmium isotopes. Source: This study												Bulk mineralogy (%). Source: Stokke et al. (2021)						Clay fraction (%). Sources: Stokke et al. (2021) and this study
Sample Name	Interval	Location	Depth	Ash Thickness	δ13Corg	Hg (ppb)	TOC	Hg/TOC	TEX86	neg-1σ	BAYSPAR -50 Temp. (°C)	pos-1σ	MAAT	BIT	δ7Li	2σ	Re (ppb)	±	Os (ppt)	±	192Os (ppt)	±	187Re/188Os	±	187Os/188Os	±	Osi at 55.9 Ma	±	Pyrite	Quartz	Feldspar	Zeolites	Mica	Clay	Illite-smectite	Mica+illite	Kaolinite	Chlorite
SK17 -0.26 to -0.27	1	Stolleklint (Fur)	-24.8168		-26.3116	34.5	0.490569	70.3265	0.59606	18.9082	21.959	25.2641		0.430466
SK17 -0.25 to -0.26	1	Stolleklint (Fur)	-24.8068			32	0.42	76.1905									4.59101	0.0308498	142.844	0.512272	56.2505	0.286153	162.37	1.36271	0.498265	0.00329971	0.34698	0.00752867	1.91	9.07	37.36	2.34	17.11	32.3	84	12	0	4
SK17 -0.24 to -0.25	1	Stolleklint (Fur)	-24.7968		-26.4754	33.5	0.466068	71.8779
SK17 -0.23 to -0.24	1	Stolleklint (Fur)	-24.7868		-26.2489	29.5	0.472059	62.4922
SK17 -0.22 to -0.23	1	Stolleklint (Fur)	-24.7768			34.5			0.613904	20.0929	23.1196	26.5444		0.413784
SK17 -0.21 to -0.22	1	Stolleklint (Fur)	-24.7668		-26.3871	38	0.450574	84.3368	0.614359	20.0764	23.1133	26.5159		0.426632
SK17 -0.20 to -0.21	1	Stolleklint (Fur)	-24.7568			31	0.42	73.8095							-0.135885	0.18402	3.69992	0.0174112	145.978	0.669581	57.3082	0.361129	128.439	1.00869	0.522988	0.00553062	0.403317	0.00922942
SK17 -0.19 to -0.20	1	Stolleklint (Fur)	-24.7468		-26.3539	32	0.468693	68.275
SK17 -0.18 to -0.19	1	Stolleklint (Fur)	-24.7368		-26.4801	32.5	0.486902	66.7485	0.619992	20.449	23.4837	26.9889		0.38259
SK17 -0.17 to -0.18	1	Stolleklint (Fur)	-24.7268			33				20.2789	23.2984	26.7389		0.390579
SK17 -0.16 to -0.17	1	Stolleklint (Fur)	-24.7168		-26.1805	30.5	0.470949	64.7628	0.617112	20.7985	23.8232	27.3141		0.423497
SK17 -0.15 to -0.16	1	Stolleklint (Fur)	-24.7068			36	0.42	85.7143									3.29688	0.0112533	209.539	0.605699	84.1662	0.342985	77.9271	0.412867	0.340503	0.00205481	0.267896	0.00696024
SK17 -0.14 to -0.15	1	Stolleklint (Fur)	-24.6968		-26.3386	36.5	0.478801	76.2322
SK17 -0.13 to -0.14	1	Stolleklint (Fur)	-24.6868		-26.2985	36	0.485434	74.1604
SK17 -0.12 to -0.13	1	Stolleklint (Fur)	-24.6768		-26.3578	35	0.493269	70.9552
SK17 -0.11 to -0.12	1	Stolleklint (Fur)	-24.6668		-26.3188	33.5	0.487194	68.7611	0.607057	19.6067	22.6491	26.0219		0.462089
SK17 -0.10 to -0.11	1	Stolleklint (Fur)	-24.6568			37.5	0.43	87.2093
PS090747	1	Stolleklint (Fur)	-24.6568		-26.7				0.61		23.8		19	0.44
SK17 -0.09 to -0.10	1	Stolleklint (Fur)	-24.6468		-26.3339	36.5	0.520488	70.1264	0.624277	20.7263	23.7301	27.2156		0.507249	-0.0243447	0.179326
SK17 -0.08 to -0.09	1	Stolleklint (Fur)	-24.6368		-26.8112	40.5	0.48583	83.3625
SK17 -0.07 to -0.08	1	Stolleklint (Fur)	-24.6268		-26.6372	54	0.33	163.636	0.601602	19.2844	22.3541	25.7117		0.411125			4.67648	0.0370027	172.455	0.534597	68.3178	0.286063	136.178	1.21693	0.450416	0.00254916	0.323534	0.00713803
SK17B-HC1-22-23mc	1	Stolleklint (Fur)	-24.63
SK17 -0.06 to -0.07	1	Stolleklint (Fur)	-24.6168		-26.8151	42.5	0.368301	115.395
SK17 -0.05 to -0.06	1	Stolleklint (Fur)	-24.6068		-25.7659	9.55	0.2	47.75	0.604501	19.4804	22.5226	25.913		0.65613	-0.653757	0.11525
SK17B-HC1-25-26mc	1	Stolleklint (Fur)	-24.61
SK17 -0.04 to -0.05	1	Stolleklint (Fur)	-24.5968		-26.5899	12	0.21	57.1429									4.30424	0.020866	156.655	0.616898	62.5634	0.398852	136.867	1.08896	0.385949	0.003222	0.258426	0.00654581
SK17 -0.03 to -0.04	1	Stolleklint (Fur)	-24.5868		-26.8542	8.7	0.19		0.564772	16.8871	19.9995	23.1002		0.794578	-1.04571	0.149354	2.13289	0.0117857	117.42	0.349813	46.8967	0.193377	90.4793	0.622309	0.385479	0.00225611	0.301177	0.00772924
SK17B-HC1-28-29cm	1	Stolleklint (Fur)
SK17 -0.02 to -0.03	1	Stolleklint (Fur)	-24.5768		-26.3218	19	0.27	70.3704	0.480712	11.1873	14.5458	17.484		0.81209
SK17 -0.01 to -0.02	2	Stolleklint (Fur)	-24.5668		-26.275	35	0.27	129.63							-0.380495	0.448429	3.31756	0.00929155	218.642	0.617257	87.6978	0.337988	75.258	0.357922	0.351702	0.00203147	0.281582	0.00816461
SK17B-HC1-31-32cm	2	Stolleklint (Fur)	-24.57						0.506164	12.9273	16.1795	19.1081		0.541922															3.723	5.02	20.01	1.09	23.7	46.43	82	12	5	1
SK17 0 to -0.01	2	Stolleklint (Fur)	-24.5568		-26.3003	34	0.33	103.03									4.05853	0.0115319	184.402	0.558175	73.7889	0.312796	109.421	0.556231	0.370461	0.00228942	0.268511	0.00738583
Ash SK1	2	Stolleklint (Fur)	-24.55	0.05
SK17B-HC1-36-37cm	2	Stolleklint (Fur)	-24.53						0.5191	13.7822	17.0071	19.9742		0.266623			3.18971	0.00731781	211.355	0.433189	84.9411	0.201645	74.7061	0.246166	0.336294	0.00121357	0.266688	0.0072571
PS090748	2	Stolleklint (Fur)	-24.53		-25.8				0.5		18.3		17.8	0.47
SK17 0.08 to 0.09	2	Stolleklint (Fur)	-24.4668		-26.7335	23	0.294986	77.9699
SK17 0.09 to 0.10	2	Stolleklint (Fur)	-24.4568		-26.431	39.5	0.589369	67.0208	0.483331	11.3336	14.6847	17.6411		0.357118
SK17 0.10 to 0.11	2	Stolleklint (Fur)	-24.4468		-26.4468	28	0.438451	63.8612	0.489238	11.7465	15.0794	18.0067		0.4285			2.72866	0.0114602	185.084	0.615086	74.2118	0.373241	73.1475	0.477424	0.354471	0.00250643	0.286318	0.00806553
PS090749	2	Stolleklint (Fur)	-24.45		-25.9				0.48		16.8		16	0.27
SK17 0.11 to 0.12	2	Stolleklint (Fur)	-24.4368		-26.5385	31.5	0.33	95.4545							-0.247848	0.441769	3.1542	0.011253	209.539	0.605699	84.1662	0.342985	74.5547	0.402507	0.340503	0.00205481	0.271162	0.00548266
Ash SK2	2	Stolleklint (Fur)	-24.43	0.07
SK17 0.18 to 0.19	3	Stolleklint (Fur)	-24.3668			80.5	0.51	157.843	0.569924	17.2148	20.3253	23.4793		0.0790859	0.15296	0.392489	196.386	0.468089	500.628	1.88446	156.391	0.343948	2498.16	8.03927	2.59261	0.00722517	0.264999	0.00487449
SK17 0.19 to 0.20	3	Stolleklint (Fur)	-24.3568		-30.0938	35	0.643684	54.3745	0.606697	19.6278	22.6762	26.0502		0.0748366
SK17 0.20 to 0.21	3	Stolleklint (Fur)	-24.3468		-30.0596	22	0.38	57.8947	0.66868	23.5874	26.5884	30.4425		0.0514236			31.6985	0.0611542	310.422	0.935764	117.802	0.323652	535.317	1.78675	0.801149	0.00322468	0.302379	0.00749142
SK17 0.21 to 0.22	3	Stolleklint (Fur)	-24.3368		-28.6168	44	1.30919	33.6086	0.684012	24.5319	27.5463	31.5442		0.0379856
SK17 0.22 to 0.23	3	Stolleklint (Fur)	-24.3268			37.5
SK17 0.23 to 0.24	3	Stolleklint (Fur)	-24.3168			42.5	1.02	41.6667
SK17 0.24 to 0.25	3	Stolleklint (Fur)	-24.3068			35
SK17 0.25 to 0.26	3	Stolleklint (Fur)	-24.2968		-30.6673	36	1.21777	29.5622	0.730958	27.4609	30.5072	34.9414		0.0536832
PS090750	3	Stolleklint (Fur)	-24.29		-30.8				0.72		28.7		20.1	0.04
SK17 0.268 to 0.276	3	Stolleklint (Fur)	-24.2798			46
SK17 0.276 to 0.284	3	Stolleklint (Fur)	-24.2718			40
SK17 0.284 to 0.292	3	Stolleklint (Fur)	-24.2638		-30.9364	36.5	1.15061	31.7223	0.726849	27.2104	30.2493	34.6648		0.0656346
SK17 0.292 to 0.300	3	Stolleklint (Fur)	-24.2558			29.5									-3.74825	0.404965	23.9615	0.0469439	383.234	1.13897	147.753	0.441283	322.628	1.14771	0.670204	0.00295006	0.369602	0.00494727
Ash SK3	4	Stolleklint (Fur)	-24.24	0.01
SK17 0.310 to 0.315	4	Stolleklint (Fur)	-24.2388		-31.1958	27.6667	0.627049	44.122																					5.253	2.215	19.69	0	22.27	50.59	90	5	5	0
PS090751	4	Stolleklint (Fur)	-24.22		-31				0.71		28.3		20.4	0.05
SK17 0.350 to 0.355	4	Stolleklint (Fur)	-24.1988		-31.2098	38.5	1.29378	29.7578	0.710415	26.1731	29.1864	33.4252		0.0750904
SK17 0.400 to 0.405	4	Stolleklint (Fur)	-24.1488			41.5
SK17 0.45 to 0.46	4	Stolleklint (Fur)	-24.0968			35
SK17 0.50 to 0.51	4	Stolleklint (Fur)	-24.0468			36	0.92	39.1304									17.8842	0.0346395	343.225	0.785693	132.898	0.260447	267.717	0.735442	0.634986	0.00183652	0.385547	0.0117345
SK17 0.55 to 0.56	4	Stolleklint (Fur)	-23.9968		-30.8297	26.5	0.861734	30.752	0.765498	29.5565	32.687	37.4764		0.076536
SK17 0.60 to 0.61	4	Stolleklint (Fur)	-23.9468			33.5
SK17 0.70 to 0.71	4	Stolleklint (Fur)	-23.8468			27.5	1.08	25.463
SK17 0.80 to 0.81	4	Stolleklint (Fur)	-23.7468		-30.9112	27.5	1.0066	27.3198	0.769671	29.8677	33.0028	37.8013		0.0575188																					52	11	37	0
SK17B 1.5	4	Stolleklint (Fur)	-23.7076			30.5
SK17 0.90 to 0.91	4	Stolleklint (Fur)	-23.6468		-31.008	31	1.02632	30.205
SK17 0.100 to 0.101	4	Stolleklint (Fur)	-23.5468			35.5	1.14	31.1404									23.5452	0.0469327	362.513	0.880835	139.739	0.325328	335.204	1.01851	0.671696	0.0020172	0.359377	0.0190767
SK17B 2.0	4	Stolleklint (Fur)	-23.4262			34
PS090781	4	Stolleklint (Fur)	-23.31		-30.9				0.77		30.9		23.1	0.04
SK17B 2.5	4	Stolleklint (Fur)	-23.1448			42
SK17B 3.0	4	Stolleklint (Fur)	-22.8634		-31.2225	41.5	1.49427	27.7728																											32	16	52	0
SK17B 3.5	4	Stolleklint (Fur)	-22.5821		-31.0647	109.5	1.41	77.6596	0.77362	30.126	33.2918	38.1395		0.0353766	-2.85713	0.255297
SK17B 4	4	Stolleklint (Fur)	-22.3007			50	0.96	52.0833									25.8028	0.0502912	353.931	0.878254	136.045	0.308434	377.317	1.12086	0.694938	0.00214498	0.343381	0.0125375
SK17B 4.5	4	Stolleklint (Fur)	-22.0193		-31.0954	50	1.40862	35.4957
PS090782	4	Stolleklint (Fur)	-21.86		-30.8				0.78		31.2		23.5	0.05
SK17B 5	4	Stolleklint (Fur)	-21.7379		-30.9466	37.5	1.17358	31.9535
SK17B 5.5	4	Stolleklint (Fur)	-21.359			32.5
SK17B 6	4	Stolleklint (Fur)	-20.98			34	1.07	31.7757
SK17B 6.5	4	Stolleklint (Fur)	-20.6011		-31.1753	29.5	0.99125	29.7604																											40	10	50	0
SK17B 7	4	Stolleklint (Fur)	-20.2222		-31.1562	30	1.17512	25.5293
SK17B 7.5	4	Stolleklint (Fur)	-19.8433		-31.2799	62	1.26	49.2063									36.7087	0.0721731	434.857	0.958015	165.388	0.267641	441.558	1.11724	0.782759	0.0018143	0.371347	0.0168179
SK17B 8	4	Stolleklint (Fur)	-19.4643			58.5	1.38	42.3913
SK17B 8.5	4	Stolleklint (Fur)	-19.0854		-31.2709	45.5	1.55102	29.3356	0.753198	28.8195	31.897	36.5726		0.0497136
SK17B 9	4	Stolleklint (Fur)	-18.7065			31	1.04	29.8077
SK17B 9.5	4	Stolleklint (Fur)	-18.3276		-31.2334	30.5	0.973548	31.3287
SK17B 10	4	Stolleklint (Fur)	-17.9486			27.5	0.82	33.5366							-2.34209	0.266965
SK17B 10.5	4	Stolleklint (Fur)	-17.6306		-30.9733	25	0.910932	27.4444
SK17B 11	4	Stolleklint (Fur)	-17.3126			31.5	1.16	27.1552									22.2357	0.0429598	312.008	0.725299	119.399	0.228073	370.489	1.00226	0.731639	0.00195273	0.386445	0.0115388							49	9	42	0
SK17B 11.5	4	Stolleklint (Fur)	-16.9946		-31.1862	34	1.01251	33.5799
SK17B 12	4	Stolleklint (Fur)	-16.6765			26	0.87	29.8851
SK17B 13	4	Stolleklint (Fur)	-16.0405		-31.1484	31	0.914224	33.9085
SK17B 14	4	Stolleklint (Fur)	-15.4044			26.5	0.88	30.1136
SK17B 15	4	Stolleklint (Fur)	-14.7684		-31.1956	31.5	1.29277	24.3664	0.743759	28.2797	31.3417	35.9135		0.0641346
SK17B 16	4	Stolleklint (Fur)	-14.1684			33.5	1.25	26.8							-1.86903	0.426607	27.2893	0.0538963	310.706	0.688286	117.676	0.221914	461.347	1.24801	0.817677	0.00179403	0.387828	0.0127531	6.06	12.54	7.91	31.65	26.31	8.36	63	17	20	0
SK17B 17	4	Stolleklint (Fur)	-13.5685		-31.1106	33	1.08146	30.5143
SK17B 18	4	Stolleklint (Fur)	-12.9685		-31.188	38.5	1.25098	30.7759
SK17B 19	5	Stolleklint (Fur)	-12.3685			53.5	1.78	30.0562									34.4878	0.0680595	383.471	0.87497	145.791	0.262177	470.607	1.2477	0.785815	0.00192078	0.347338	0.012427
SK17B 20	5	Stolleklint (Fur)	-11.7686		-31.2628	55	2.10457	26.1336
SK17B 21	5	Stolleklint (Fur)	-11.1262		-31.3685	64	2.45245	26.0964	0.723882	27.0396	30.0738	34.4476		0.0459188
SK17B 22	5	Stolleklint (Fur)	-10.4838			59	2.24	26.3393							-1.57277	0.229072	40.0165	0.0819173	450.534	0.90836	170.677	0.25523	466.429	1.17505	0.815564	0.00152995	0.380979	0.0128221	7.08	12.63	20.52	36.1	23.67	0	68	25	0	7
SK17B 23	5	Stolleklint (Fur)	-9.84146		-31.3837	57	2.33191	24.4435
SK17B 24	5	Stolleklint (Fur)	-9.19908		-31.3506	62.5	2.40806	25.9545
SK17B 25	5	Stolleklint (Fur)	-8.55671			70	2.61	26.8199							-1.73704	0.0776642	44.6492	0.0860242	513.643	1.10809	194.785	0.299737	456.017	1.11825	0.806987	0.00175757	0.382104	0.0120973
SK17B 26	5	Stolleklint (Fur)	-7.89902		-31.3708	57.5	2.7316	21.05
SK17B 27	5	Stolleklint (Fur)	-7.24133		-31.3265	72	2.21191	32.551
SK17B 28	5	Stolleklint (Fur)	-6.58364			58.5	1.78	32.8652									37.0353	0.0933296	417.634	1.06378	158.918	0.334753	463.624	1.51622	0.778544	0.00235928	0.346572	0.0115816
SK17B 29	5	Stolleklint (Fur)	-5.92596		-31.486	55.5	2.30852	24.0413	0.702075	25.6593	28.6787	32.8511		0.0533931																					67	33	0	0
FQ16-01	6	Hestehaven (Fur)	-5.59		-31.107	60.5	1.37418	44.0263
FQ16-04	6	Hestehaven (Fur)	-5.29		-30.8252	73	0.888821	82.1313
SK17B 30	6	Stolleklint (Fur)	-5.26827			69.3333
FQ16-07	6	Hestehaven (Fur)	-4.99		-30.9888	105.5	0.806225	130.857
Ash -39	6	Stolleklint (Fur)	-4.94	0.02		37.866
FQ16-10	6	Hestehaven (Fur)	-4.69		-30.7697	47.5	0.932891	50.917
SK17B 31	6	Stolleklint (Fur)	-4.48204			44	2.45	17.9592
FQ16-13	6	Hestehaven (Fur)	-4.39		-30.9848	75.5	2.46387	30.6428
FQ16-16	6	Hestehaven (Fur)	-4.09		-31.3887	74.3333	2.61582	28.4169
FQ16-19	6	Hestehaven (Fur)	-3.79		-31.007	59.5	1.98229	30.0157
SK17B 32	6	Stolleklint (Fur)	-3.69581		-31.3816	45	2.62428	17.1476
FQ16-22	6	Hestehaven (Fur)	-3.49		-31.2383	160	2.26014	70.7919
FQ16-25	6	Hestehaven (Fur)	-3.19		-31.3776	58.5	2.71674	21.5331
SK17B 33	6	Stolleklint (Fur)	-2.90959		-31.5011	46	3.13764	14.6607	0.674295	23.905	26.8993	30.7891		0.0589802
FQ16-28	6	Hestehaven (Fur)	-2.89		-31.2453	58	2.28265	25.409
FQ16-31	6	Hestehaven (Fur)	-2.59		-31.1514	74.5	2.32461	32.0484
Ash -35	6	Stolleklint (Fur)	-2.43785	0.02
FQ16-34	6	Hestehaven (Fur)	-2.29		-31.0716	94.5	1.57957	59.8263
SK16-B225	6	Stolleklint (Fur)	-2.25		-31.2019	53	2.29698	23.0738							-1.84	0.316
SK17B 34	6	Stolleklint (Fur)	-2.12336			66	3.14	21.0191	0.679401	24.2148	27.2052	31.1562		0.0498757			74.0997	0.141703	591.711	1.27921	219.718	0.29385	670.927	1.55752	0.984494	0.00186148	0.359374	0.0142196
FQ16-37	6	Hestehaven (Fur)	-1.99		-31.3645	66.5	2.96517	22.427
FQ16-40	6	Hestehaven (Fur)	-1.69		-31.3493	63.5	2.40049	26.4529
SK16-B165	6	Stolleklint (Fur)	-1.65		-31.2059	47.5	2.42327	19.6016
FQ16-43	6	Hestehaven (Fur)	-1.39		-30.2738	226.5	0.69987	323.632							-0.653	0.22
SK17B 35	6	Stolleklint (Fur)	-1.33713			52.5
FQ16-46	6	Hestehaven (Fur)	-1.09		-30.6647	48	0.857407	55.9827
SK17B 35.5	6	Stolleklint (Fur)	-1.03361			45.5			0.712402	26.3035	29.3277	33.5693		0.0588487
PS090783	6	Stolleklint (Fur)	-1		-31.5				0.71		28.4		20.9	0.05
SK16-B86	6	Stolleklint (Fur)	-0.86		-31.417	47	2.93769	15.9989
Ash -34	6	Stolleklint (Fur)	-0.85	0.02
SK17B 36	6	Stolleklint (Fur)	-0.782699			71	3.9	18.2051									76.4365	0.14647	644.52	3.50323	242.119	1.36045	628.051	3.72571	0.8862	0.00988792	0.301027	0.0156919
FQ16-50	6	Hestehaven (Fur)	-0.69		-30.7828	65	0.706095	92.0557
FQ16-52	6	Hestehaven (Fur)	-0.49		-29.878	67	0.489922	136.756
SK17B 37	6	Stolleklint (Fur)	-0.446194			56
SK17B 37.5	6	Stolleklint (Fur)	-0.277942			55
FQ16-55	6	Hestehaven (Fur)	-0.19		-30.9323	43	1.01139	42.5157
SK16-B17	6	Stolleklint (Fur)	-0.17		-31.3332	48	3.40336	14.1037	0.667811	23.5413	26.5395	30.3675		0.0584747	-0.716	0.281
SK17B 38	6	Stolleklint (Fur)	-0.109689			65.5	2.11	31.0427																											77	20	0	3
Ash -33	6	Stolleklint (Fur)	0	0.14		52.72
SK17B 38.27	7	Stolleklint (Fur)	0.01			56
SK17B 38.5	7	Stolleklint (Fur)	0.01			45.5	2.44	18.6475
Ash -32	7	Stolleklint (Fur)	0.04	0.02
Ash -31	7	Stolleklint (Fur)	0.05	0.03
FU179	7	Stendal West (Fur)	0.0656934			20.6	0.308022	66.8783
FQ16-58	7	Hestehaven (Fur)	0.11		-29.7891	66.5	0.841416	79.0334
FU180	7	Stendal West (Fur)	0.284672			21.9	0.276374
FQ16-62	7	Hestehaven (Fur)	0.31		-30.0507	70.5	0.695688	101.339									6.93101	0.0250416	560.474	2.27497	210.514	0.942785	65.4996	0.375436	0.887501	0.00551759	0.826473	0.0137532
FU181	7	Stendal West (Fur)	0.50365			32.2	0.274629
FQ16-64	7	Hestehaven (Fur)	0.51		-29.9022	55	0.504666	108.983							-2.41179	1.18738
FU182	7	Stendal West (Fur)	0.722628			28.3	0.332932	85.0024
FQ16-67	7	Hestehaven (Fur)	0.81		-29.5387	41	0.605227	67.7432
FU183	7	Stendal West (Fur)	0.941606			34.3	0.335291	102.299
FQ16-70	7	Hestehaven (Fur)	1.11		-28.963	34	0.398052	85.4159
FU184	7	Stendal West (Fur)	1.16058			44.4	0.335134	132.484
FU185	7	Stendal West (Fur)	1.37956			52.7	0.321572	163.883
FQ16-73	7	Hestehaven (Fur)	1.41		-28.8711	29.5	0.647482	45.5611
FU186	7	Stendal West (Fur)	1.59854			53	0.430626	123.077
FQ16-76	7	Hestehaven (Fur)	1.71		-29.1357	53	0.909571	58.2692	0.590291	18.5201	21.5876	24.8817		0.204493	-1.659	0.269	6.60908	0.0143043	96.6299	0.381314	35.1597	0.150669	373.954	1.77089	1.1594	0.00561515	0.810977	0.016969
FU187	7	Stendal West (Fur)	1.81752			29.9	0.358586	83.383
FQ16-78	7	Hestehaven (Fur)	1.91		-27.728	39	0.647968	60.1881							0.186	0.287
PS090784	7	Stolleklint (Fur)	2		-29.8				0.59		22.7		17.9	0.09
FU188	7	Stendal West (Fur)	2.0365			47.7	0.441791	107.97
FU189	7	Stendal West (Fur)	2.14599			23.3	0.123705
FU190	7	Stendal West (Fur)	2.25547			77.6	0.22916
FU191	7	Stendal West (Fur)	2.47445			36.3	0.142675
FU192	7	Stendal West (Fur)	2.69343			31.9	0.221799
FU193	7	Stendal West (Fur)	2.91241			40.9	0.24832
FU194	7	Stendal West (Fur)	3.13139			17.6	0.196818
FU195	7	Stendal West (Fur)	3.35036			20.1	0.178851
FU196	7	Stendal West (Fur)	3.56934			26.3	0.217499
FU197	7	Stendal West (Fur)	3.78832			25.8	0.229618
FU198	7	Stendal West (Fur)	4.0073			21	0.207538
FU199	7	Stendal West (Fur)	4.22628			19.9	0.173908
Fur15-4.30m	7	Stolleklint (Fur)	4.3		-27.0562	29	0.910869	31.8377
FU200	7	Stendal West (Fur)	4.44526			16.7	0.154636
Ash -21a	7	Stolleklint (Fur)	4.5	0.05
Ash -21a	7	Stendal West (Fur)	4.5	0.05
FU202	8	Stendal West (Fur)	4.63235			18.7	0.112151
FU203	8	Stendal West (Fur)	4.80882			32.8	0.153846
FU204	8	Stendal West (Fur)	4.98529			47.2	0.226567
FU205	8	Stendal West (Fur)	5.16176			47.2	0.20192
FU206	8	Stendal West (Fur)	5.33824			28.5	0.172191
Fur15-5.35m	8	Stolleklint (Fur)	5.35		-26.8756	26	0.542346	47.9398																					0.11	19	35.23	0	29	16.64	70	19	11	0
Fur15-5.50m	8	Stolleklint (Fur)	5.5		-26.9281	33.5	1.23146	27.2034	0.481571	11.2632	14.6068	17.5538		0.129616	-2.16023	0.272128
FU207	8	Stendal West (Fur)	5.51471			47.5	0.187282
FU208	8	Stendal West (Fur)	5.69118			34.5	0.1609
FU209	8	Stendal West (Fur)	5.86765			20	0.152165
FU210	8	Stendal West (Fur)	6.04412			32.7	0.164689
FU211	8	Stendal West (Fur)	6.22059			44.9	0.170744
FU212	8	Stendal West (Fur)	6.39706			31.5	0.128496
FU213	8	Stendal West (Fur)	6.57353			19	0.116808
Ash -19	8	Stolleklint (Fur)	6.6	0.02
Ash -19	8	Stendal West (Fur)	6.6	0.03		9.3	0.123296
FU215	8	Stendal West (Fur)	6.77884			32.5	0.115913
FU216	8	Stendal West (Fur)	6.98923			21	0.233264
FU217	8	Stendal West (Fur)	7.19963			30.7	0.285144
FU218	8	Stendal West (Fur)	7.41002			66.6	0.399193	166.836
FU219	8	Stendal West (Fur)	7.62042			58.8	0.401988	146.273
FU220	8	Stendal West (Fur)	7.83082			50	0.484743	103.148
FU221	8	Stendal West (Fur)	8.04121			67.3	0.437155	153.95
FU222	8	Stendal West (Fur)	8.25161			43.7	0.660979	66.114
FU223	8	Stendal West (Fur)	8.462			69.5	0.515825	134.736
FU224	8	Stendal West (Fur)	8.6724			40.6	0.330916	122.69
FU225	8	Stendal West (Fur)	8.8828			46.9	0.418775	111.993
Ash -18	8	Stolleklint (Fur)	7.4	0.01
Fur15-7.65m	8	Stolleklint (Fur)	7.65		-26.5792	64	3.22008	19.8753							-1.39216	0.0806502	189.101	0.366219	795.392	3.91892	265.382	0.90804	1417.58	5.523	1.94705	0.0108387	0.626256	0.0149709
Fur15-8.65m	8	Stolleklint (Fur)	8.65		-26.5519	40	1.09778	36.4373	0.498565	12.4298	15.7303	18.6594		0.113952
FU226	8	Stendal West (Fur)	9.09319			36.1	0.375986	96.0141
FU227	8	Stendal West (Fur)	9.30359			41	0.472535	86.766
FU228	8	Stendal West (Fur)	9.51399			36.6	0.668058	54.7857
Fur15-9.65	8	Stolleklint (Fur)	9.65		-27.2739	31.5	1.94536	16.1923
FU229	8	Stendal West (Fur)	9.72438			39.5	0.673897	58.6143
FU230	8	Stendal West (Fur)	9.93478			38.9	0.526697	73.8565
FU231	8	Stendal West (Fur)	10.1452			44.6	0.413534	107.851
FU232	8	Stendal West (Fur)	10.3556			45	0.368143	122.235
FU233	8	Stendal West (Fur)	10.566			44.2	0.330325	133.808
Fur15-10.7	8	Stolleklint (Fur)	10.7		-26.9039	39.5	1.71229	23.0685
FU234	8	Stendal West (Fur)	10.7764			33.8	0.420748	80.3332
Ash -17	8	Stolleklint (Fur)	10.85	0.06
Ash -17	8	Stendal West (Fur)	10.85	0.04
FU236	8	Stendal West (Fur)	10.9789			31	0.188401
PS090785	8	Stolleklint (Fur)	11		-27.1				0.53		20		16.9	0.05
Fur15-11.1	8	Stolleklint (Fur)	11.1		-26.9299	30	0.943535	31.7953	0.562855	16.7482	19.8723	23.0026		0.294368	-0.254	0.202																			84	16	0	0
FU237	8	Stendal West (Fur)	11.1771			50.8	0.406833	124.867
FU238	8	Stendal West (Fur)	11.3754			45.4	0.332241	136.648
FU239	8	Stendal West (Fur)	11.5736			40	0.352949	113.331
FU240	8	Stendal West (Fur)	11.7719			37.9	0.302798	125.166
FU241	8	Stendal West (Fur)	11.9701			47.8	0.422222	113.211
FU242	8	Stendal West (Fur)	12.1683			41.2	0.473093	87.0864
FU243	8	Stendal West (Fur)	12.3666			43.7	0.525912	83.0938
Fur15-12.4	8	Stolleklint (Fur)	12.4		-26.6881	20	0.998539	20.0293							0.482	0.271
FU244	8	Stendal West (Fur)	12.5648			42.4	0.383981	110.422
FU245	8	Stendal West (Fur)	12.7631			44.6	0.397057	112.326
FU246	8	Stendal West (Fur)	12.9613			41.2	0.305199	134.994
FU247	8	Stendal West (Fur)	13.1596			64.9	0.375189	172.98
Fur15-13.3	8	Stolleklint (Fur)	13.3		-26.7406	22.5	1.08209	20.7931
FU248	8	Stendal West (Fur)	13.3578			64.5	0.297959
FU249	8	Stendal West (Fur)	13.5561			42.6	0.282771
FU250	8	Stendal West (Fur)	13.7543			45.1	0.0299782
FU251	8	Stendal West (Fur)	13.9526			83	0.306866	270.477
Fur15-14.0	8	Stolleklint (Fur)	14		-26.0059	48.5	0.796105	60.9216
FU252	8	Stendal West (Fur)	14.1508			29.8	0.248467
FU253	8	Stendal West (Fur)	14.3491			18.6	0.190316
FU254	8	Stendal West (Fur)	14.5473			73	0.640157	114.035
FU255	8	Stendal West (Fur)	14.7456			22.2	0.239296
FU256	8	Stendal West (Fur)	14.9438			57.6	0.29404
Fur15-15.0	8	Stolleklint (Fur)	15		-25.9408	48.5	1.09132	44.4416	0.621774	20.5922	23.5984	27.1031		0.746052			12.71	0.02	1009.4	3.2	366.7	0.9	69	0.2	1.174	0.004	1.11	0.0128432
FU257	8	Stendal West (Fur)	15.1421			50.8	0.28711
FU258	8	Stendal West (Fur)	15.3403			56.3	0.347726	161.909
FU259	8	Stendal West (Fur)	15.5386			54.7	0.421533	129.765
FU260	8	Stendal West (Fur)	15.7368			27.4	0.258054
FU261	8	Stendal West (Fur)	15.935			25.3	0.244753
Fur15-16.0	8	Stolleklint (Fur)	16		-26.8463	25	0.755303	33.0993
FU262	8	Stendal West (Fur)	16.1333			47.5	0.305789	155.336
FU263	8	Stendal West (Fur)	16.3315			40.1	0.308577	129.951
FU1	8	Skarrehage (Mors)	16.5001			40.9	0.719296	56.8611
FU264	8	Stendal West (Fur)	16.5298			32.2	0.244534
FU2	8	Skarrehage (Mors)	16.6983			51.8	0.662164	78.2284
FU265	8	Stendal West (Fur)	16.728			34.8	0.329904	105.485
FU3	8	Skarrehage (Mors)	16.8965			51.8	1.03183	50.2021
FU266	8	Stendal West (Fur)	16.9263			43.8	0.312136	140.324
Fur15-17.0	8	Stolleklint (Fur)	17		-26.1452	55	0.699048	78.6784
FU4	8	Skarrehage (Mors)	17.0948			51.3	0.759835	67.5146
FU267	8	Stendal West (Fur)	17.1245			44.2	0.355501	124.331
FU5	8	Skarrehage (Mors)	17.293			40	0.614658	65.0768
FU268	8	Stendal West (Fur)	17.3228			46.6	0.327368	142.347
FU6	8	Skarrehage (Mors)	17.4913			41.8	0.458577	91.1516
FU269	8	Stendal West (Fur)	17.521			35	0.314542	111.273
FU7	8	Skarrehage (Mors)	17.6895			69.7	0.55	126.727
FU270	8	Stendal West (Fur)	17.7193			34.3	0.389186	88.1326
FU8	8	Skarrehage (Mors)	17.8878			62.8	0.52	120.769
FU271	8	Stendal West (Fur)	17.9175			33.1	0.621163	53.2871
Fur15-18.0	8	Stolleklint (Fur)	18		-26.2904	19	1.3515	14.0584	0.549271	15.8068	18.9463	22.019		0.208723
FU9	8	Skarrehage (Mors)	18.086			66.6	0.51	130.588
FU272	8	Stendal West (Fur)	18.1158			37.4	0.555123	67.3725
FU10	8	Skarrehage (Mors)	18.2843			74.4	0.467181	159.253
FU273	8	Stendal West (Fur)	18.314			52.1	0.437712	119.028
Ash -15	8	Skarrehage (Mors)	18.4825	0.05
FU274	8	Stendal West (Fur)	18.5123			46.2	0.506704	91.1775
FU12	8	Skarrehage (Mors)	18.6808			39.7	0.497982	79.7218
FU275	8	Stendal West (Fur)	18.7105			50.4	0.450581	111.856
FU13	8	Skarrehage (Mors)	18.879			59	0.355178	166.114
FU276	8	Stendal West (Fur)	18.9088			51.3	0.427439	120.017
FU14	8	Skarrehage (Mors)	19.0773			50.6	0.260939
FU277	8	Stendal West (Fur)	19.107			40	0.198631
FU15	8	Skarrehage (Mors)	19.2755			61	0.662468	92.08
FU278	8	Stendal West (Fur)	19.3053			38.8	0.384355	100.948
FU16	8	Skarrehage (Mors)	19.4738			70.4	0.277115
FU279	8	Stendal West (Fur)	19.5035			32.1	0.0570524
Fur15-19.6	8	Stolleklint (Fur)	19.6		-26.7877	90.5	1.54674	58.51							-1.94802	0.261553																			52	25	23	0
FU17	8	Skarrehage (Mors)	19.672			57.8	0.46	125.652
FU280	8	Stendal West (Fur)	19.7018			32	0.180941
FU18	8	Skarrehage (Mors)	19.8703			302.8	0.497687	608.414
Ash -13	8	Elke (Fur)	19.9	0.05
Ash -13	8	Stendal West (Fur)	19.9	0.06
FU20	8	Skarrehage (Mors)	20.455			32.9	0.222056
Ash -12	8	Elke (Fur)	20.8	0.06
FU21 ash -12	8	Skarrehage (Mors)	20.8	0.06
FU22	8	Skarrehage (Mors)	21.05			41.4	0.41735	99.1974
FU23	8	Skarrehage (Mors)	21.3			45.6	0.41	111.22
FU24	8	Skarrehage (Mors)	21.55			51.3	0.338991	151.332
Ash -11	8	Elke (Fur)	21.8	0.05
Ash -11	8	Skarrehage (Mors)	21.8	0.04
PQ16-1.0	8	Elke (Fur)	21.9		-27.4994		0.662446		0.563308	16.7205	19.8549	22.9853		0.797768
FU26	8	Skarrehage (Mors)	21.9909			42.4	0.370159	114.545
FU27	8	Skarrehage (Mors)	22.1818			38.1	0.530095	71.8738
FU28	8	Skarrehage (Mors)	22.3727			43.4	0.4119	105.365
FU29	8	Skarrehage (Mors)	22.5636			42.5	0.444044	95.7113
FU30	8	Skarrehage (Mors)	22.7545			51.9	0.390456	132.922
PQ16-2.0	8	Elke (Fur)	22.9		-27.8014		0.5754
FU31	8	Skarrehage (Mors)	22.9455			67.7	0.299731
FU32	8	Skarrehage (Mors)	23.1364			46.5	0.404811	114.868
FU33	8	Skarrehage (Mors)	23.3273			50.2	0.661055	75.9392
FU34	8	Skarrehage (Mors)	23.5182			43.9	0.809375	54.2394
FU35	8	Skarrehage (Mors)	23.7091			81.8	0.27856
PQ16-3.0	8	Elke (Fur)	23.9		-27.3108		0.555798
FU36	8	Skarrehage (Mors)	23.9			34.8	0.25104
FU37	8	Skarrehage (Mors)	24.0909			28.3	0.197396
FU38	8	Skarrehage (Mors)	24.2818			34.3	0.157684
FU39	8	Skarrehage (Mors)	24.4727			39.2	0.275434
FU40	8	Skarrehage (Mors)	24.6636			28.7	0.199164
FU41	8	Skarrehage (Mors)	24.8545			22.2	0.161054
PQ16-4.0	8	Elke (Fur)	24.9		-27.4256		0.534632		0.599595	19.1876	22.2277	25.5512		0.916856	-3.18462	0.0647654
FU42	8	Skarrehage (Mors)	25.0455			36.3	0.497598	72.9505
FU43	8	Skarrehage (Mors)	25.2364			28.9	0.398303	72.5578
FU44	8	Skarrehage (Mors)	25.4273			28.8	0.409701	70.2952
FU45	8	Skarrehage (Mors)	25.6182			21.3	0.221107
FU46	8	Skarrehage (Mors)	25.8091			23.5	0.359874	65.3006
PQ16-5.0	8	Elke (Fur)	25.9		-27.1159		0.668982		0.47047	10.4613	13.8434	16.7884		0.616871																					72.5	27.5	0	0
Ash +1	9	Knudeklint (Fur)	26	0.07
Ash +1	9	Skarrehage (Mors)	26	0.1
FU48	9	Skarrehage (Mors)	26.1429			29.2	0.307503	94.9586
Ash +3	9	Knudeklint (Fur)	26.25	0.06
FU49	9	Skarrehage (Mors)	26.2857			34.1	0.398306	85.6126
Ash +4	9	Knudeklint (Fur)	26.38	0.03
FU51	9	Skarrehage (Mors)	26.5714			24.9	0.319692	77.8874
FU52	9	Skarrehage (Mors)	26.7143			35.4	0.356391	99.329
FU53	9	Skarrehage (Mors)	26.8571			25.8	0.249957
Ash +9	9	Knudeklint (Fur)	27	0.05
Ash +9	9	Skarrehage (Mors)	27	0.08
JH17 0.05	9	Stendal East (Fur)	27.05		-28.4592		0.315365								-3.95394	0.408709	0.91	0.01	250.1	0.6	98.4	0.2	18.4	0.1	0.506	0.002	0.49	0.0204164
FU55	9	Skarrehage (Mors)	27.172			30.8	0.329686	93.4224
JH17 0.2	9	Stendal East (Fur)	27.2
FU56	9	Skarrehage (Mors)	27.344			22.9	0.214728
Ash +10	9	Knudeklint (Fur)	27.4	0.02
FU57	9	Skarrehage (Mors)	27.516			38.1	0.461074	82.6331
JH17 0.6	9	Stendal East (Fur)	27.6
FU58	9	Skarrehage (Mors)	27.688			15	0.148005
Ash +11	9	Knudeklint (Fur)	27.7	0.01
Ash +12	9	Knudeklint (Fur)	27.8	0.05
Ash +13	9	Knudeklint (Fur)	27.97	0.01
JH17 1.0	9	Stendal East (Fur)	28		-27.5902		0.332355
FU60	9	Skarrehage (Mors)	28.032			38.56	0.24461
Ash +14	9	Knudeklint (Fur)	28.05	0.03
Ash +14	9	Skarrehage (Mors)	28.05	0.02
JH17 1.2	9	Stendal East (Fur)	28.2
FU62	9	Skarrehage (Mors)	28.376			35	0.262818
JH17 1.4	9	Stendal East (Fur)	28.4		-26.7415		0.456877
FU63	9	Skarrehage (Mors)	28.548			42.5	0.227274
JH17 1.6	9	Stendal East (Fur)	28.6
FU64	9	Skarrehage (Mors)	28.72			43.2	0.18825
Ash +15	9	Knudeklint (Fur)	28.75	0.01
Concretion A +15	9	Knudeklint (Fur)	28.77						0.475534		14.09			0.0772931
Concretion B +15	9	Knudeklint (Fur)	28.78						0.476212		14.09			0.0704405
Glendonite	9	Knudeklint (Fur)	28.79						0.468057		13.5			0.104646
JH17 1.8	9	Stendal East (Fur)	28.8
FU65	9	Skarrehage (Mors)	28.892			23.01	0.349295	65.8756
JH17 2.0	9	Stendal East (Fur)	29		-27.3069		0.437062		0.611763	19.9337	22.988	26.3778		0.502279
FU66	9	Skarrehage (Mors)	29.064			43.8	0.704238	62.1948
Ash +16 (double)	9	Knudeklint (Fur)	29.13	0.02
JH17 2.2	9	Stendal East (Fur)	29.2
Ash +18 (double)	9	Skarrehage (Mors)	29.28	0.05
Ash +18 (double)	9	Knudeklint (Fur)	29.28	0.03
JH17 2.4	9	Stendal East (Fur)	29.4
FU68	9	Skarrehage (Mors)	29.408			31	0.278362
JH17 2.5	9	Stendal East (Fur)	29.5		-27.1196		0.442134
Ash +19	9	Knudeklint (Fur)	29.58	0.15
Ash +19	9	Skarrehage (Mors)	29.58	0.2
JH17 2.7	9	Stendal East (Fur)	29.7
JH17 2.8	9	Stendal East (Fur)	29.8
FU70	9	Ejerslev (Mors)	29.8281			12.1	0.0387317
FU71	9	Ejerslev (Mors)	29.977			26.1	0.190205
JH17 3.0	9	Stendal East (Fur)	30		-26.9343		0.658871		0.551537	16.0042	19.1732	22.2381		0.515178																					100	0	0	0
Ash +22	9	Knudeklint (Fur)	30.04	0.06
FU72	9	Ejerslev (Mors)	30.0762			28.2	0.158981
JH17 3.2	9	Stendal East (Fur)	30.2
Ash +23	9	Knudeklint (Fur)	30.21	0.02
FU73	9	Ejerslev (Mors)	30.2251			6.3	0.201207
FU74 ash	9	Ejerslev (Mors)	30.3541	0.08
Ash +24	9	Knudeklint (Fur)	30.36	0.03
JH17 3.4	9	Stendal East (Fur)	30.4		-26.393		0.675528
FU75	9	Ejerslev (Mors)	30.4236			26.4	0.167113
FU76 ash	9	Ejerslev (Mors)	30.4534	0.03
FU77	9	Ejerslev (Mors)	30.5229			32.2	0.376208	85.5909
Ash +25	9	Ejerslev (Mors)	30.5626	0.04
JH17 3.6	9	Stendal East (Fur)	30.6
FU79	9	Ejerslev (Mors)	30.6221			63.4	0.548167	115.658
FU80	9	Ejerslev (Mors)	30.7114			47.4	0.394057	120.287
FU81 ash	9	Ejerslev (Mors)	30.7313	0.02
FU82	9	Ejerslev (Mors)	30.7908			36.5	0.362106	100.799
JH17 3.8	9	Stendal East (Fur)	30.8
FU83	9	Ejerslev (Mors)	30.8603			42.2	0.381398	110.646
Ash +30	9	Knudeklint (Fur)	30.9	0.03
Ash +30	9	Ejerslev (Mors)	30.9	0.04
Ash +31	9	Knudeklint (Fur)	30.95	0.04
FU85	9	Ejerslev (Mors)	30.9966			40.5	0.545183	74.287
JH17 4.0	9	Stendal East (Fur)	31		-27.6722		0.561174		0.521776	13.9914	17.2054	20.197		0.579411	-1.42316	0.278057
FU87	9	Ejerslev (Mors)	31.0609			50.4	0.331682	151.953
Ash +32	9	Knudeklint (Fur)	31.08	0.02
Ash +32	9	Ejerslev (Mors)	31.08	0.02
Ash +33	9	Knudeklint (Fur)	31.14	0.01
Ash +33	9	Ejerslev (Mors)	31.14	0.02
FU89	9	Ejerslev (Mors)	31.1575			40.2	0.499541	80.4739
Ash +34	9	Knudeklint (Fur)	31.2	0.02
Ash +34	9	Ejerslev (Mors)	31.2	0.02
FU91	9	Ejerslev (Mors)	31.2862			29.9	0.291404
Ash +35	9	Knudeklint (Fur)	31.38	0.06
Ash +35	9	Ejerslev (Mors)	31.3828	0.06
JH17 4.4	9	Stendal East (Fur)	31.4
FU93	9	Ejerslev (Mors)	31.4311			23.6	0.233486
Ash +36	9	Knudeklint (Fur)	31.48	0.03
Ash +36	9	Ejerslev (Mors)	31.4793	0.03
JH17 4.6	9	Stendal East (Fur)	31.6		-27.0425		0.380167
FU95	9	Ejerslev (Mors)	31.6403			8.8	0.254861
JH17 4.8	9	Stendal East (Fur)	31.8
FU96	9	Ejerslev (Mors)	31.8012			16.9	0.198288
Ash +37	9	Knudeklint (Fur)	31.82	0.02
Ash +37	9	Ejerslev (Mors)	31.8173	0.01
FU98	9	Ejerslev (Mors)	31.8977			12.6	0.0808468
Ash +38	9	Ejerslev (Mors)	31.9299	0.02
Ash +38	9	Knudeklint (Fur)	31.94	0.01
JH17 5.0	9	Stendal East (Fur)	32		-27.2983		0.352156
FU100	9	Ejerslev (Mors)	32.0908			22.7	0.197691
JH17 5.2	9	Stendal East (Fur)	32.2
FU101	9	Ejerslev (Mors)	32.2518			28.9	0.217484
JH17 5.4	9	Stendal East (Fur)	32.4		-26.726		0.351015
FU102	9	Ejerslev (Mors)	32.4127			12.2	0.130515
FU103 ash	9	Ejerslev (Mors)	32.4449	0.02
FU104	9	Ejerslev (Mors)	32.5736			16.2	0.136427
JH17 5.6	9	Stendal East (Fur)	32.6
FU105	9	Ejerslev (Mors)	32.6863			19.1	0.153174
FU106 ash	9	Ejerslev (Mors)	32.7184	0.02
JH17 5.8	9	Stendal East (Fur)	32.8
FU107	9	Ejerslev (Mors)	32.8311			20.2	0.0864471
FU108	9	Ejerslev (Mors)	32.9276			21.6	0.127857
FU109 ash	9	Ejerslev (Mors)	32.9598	0.02
JH17 6.0	9	Stendal East (Fur)	33		-27.4871		0.242958
FU110	9	Ejerslev (Mors)	33.0081			31.7	0.128846
FU111	9	Ejerslev (Mors)	33.0725			21.5	0.127625
FU112 ash	9	Ejerslev (Mors)	33.1208	0.03
JH17 6.2	9	Stendal East (Fur)	33.2
Ash +41	9	Knudeklint (Fur)	33.21	0.01
FU113	9	Ejerslev (Mors)	33.2978			16.7	0.0823554
JH17 6.4	9	Stendal East (Fur)	33.4
FU114	9	Ejerslev (Mors)	33.4909			29.7	0.158507
Ash +42	9	Knudeklint (Fur)	33.54	0.03
JH17 6.6	9	Stendal East (Fur)	33.6		-27.0002		0.424758
Ash +43	9	Knudeklint (Fur)	33.6	0.02
FU115	9	Ejerslev (Mors)	33.684			29.9	0.330465	90.4787
Ash +44	9	Knudeklint (Fur)	33.7	0.01
Ash +44	9	Ejerslev (Mors)	33.7162	0.02
Ash +45	9	Knudeklint (Fur)	33.8	0.03
FU117	9	Ejerslev (Mors)	33.8288			29	0.512425	56.5936
FU118 ash	9	Ejerslev (Mors)	33.861	0.02
FU119	9	Ejerslev (Mors)	33.9415			21.4	0.261655
JH17 7.0	9	Stendal East (Fur)	34		-26.812		0.4144		0.536314	14.9443	18.1271	21.1252		0.488138			1.03	0.01	54.2	0.2	21	0.1	97.8	0.6	0.636	0.004	0.54	0.013806
FU120	9	Ejerslev (Mors)	34.0219			28.3	0.257723
FU121 ash	9	Ejerslev (Mors)	34.0863	0.04
FU122	9	Ejerslev (Mors)	34.1829			24.5	0.277715
JH17 7.2	9	Stendal East (Fur)	34.2
Ash +46	9	Knudeklint (Fur)	34.21	0.02
FU123 ash	9	Ejerslev (Mors)	34.2311	0.03
Ash +47	9	Knudeklint (Fur)	34.33	0.02
FU124	9	Ejerslev (Mors)	34.3599			15	0.141287
FU125 ash	9	Ejerslev (Mors)	34.376	0.01
JH17 7.4	9	Stendal East (Fur)	34.4		-26.8117		0.48924
Ash +48	9	Knudeklint (Fur)	34.43	0.04
FU126	9	Ejerslev (Mors)	34.4564			24.5	0.210351
Ash +49	9	Knudeklint (Fur)	34.57	0.02
JH17 7.6	9	Stendal East (Fur)	34.6
Ash +50	9	Knudeklint (Fur)	34.66	0.01
FU128	9	Ejerslev (Mors)	34.7461			11.9	0.329997	36.0609
Ash +51	9	Knudeklint (Fur)	34.76	0.08
JH17 7.8	9	Stendal East (Fur)	34.8
Ash +52	9	Knudeklint (Fur)	34.89	0.01
FU129	9	Ejerslev (Mors)	34.907			12.4	0.228493
JH17 8.0	9	Stendal East (Fur)	35		-26.9985		0.33121		0.540261	15.2209	18.3832	21.3911		0.773611																					100	0	0	0
Ash +53	9	Knudeklint (Fur)	35.01	0.01
FU130	9	Ejerslev (Mors)	35.0679			5.7	0.0873149
Ash +54	9	Knudeklint (Fur)	35.14	0.03
JH17 8.2	9	Stendal East (Fur)	35.2
FU131	9	Ejerslev (Mors)	35.3093			10.2	0.298569	34.163
Ash +55	9	Knudeklint (Fur)	35.37	0.04
Ash +55	9	Ejerslev (Mors)	35.3898	0.05
JH17 8.4	9	Stendal East (Fur)	35.4
FU133	9	Ejerslev (Mors)	35.4542			9.9	0.252699
FU134	9	Ejerslev (Mors)	35.5185			18	0.263868
FU135 ash	9	Ejerslev (Mors)	35.5668	0.03
JH17 8.6	9	Stendal East (Fur)	35.6		-26.924		0.490954
FU136	9	Ejerslev (Mors)	35.7277			15	0.163264
Ash +59	9	Knudeklint (Fur)	35.77	0.04
JH17 8.8	9	Stendal East (Fur)	35.8
Concretion A below +60-62	9	Knudeklint (Fur)	35.86						0.437436		14.0386			0.202665
Glendonite below +60-62	9	Knudeklint (Fur)	35.87						0.416164		12.5577			0.221441
Glendonite below +60-62	9	Knudeklint (Fur)	35.88
FU137	9	Ejerslev (Mors)	35.8887			26.1	0.263458
Ash +60	9	Knudeklint (Fur)	35.98	0.07
JH17 9.0	9	Stendal East (Fur)	36		-27.2826		0.464706		0.505181	12.8581	16.115	19.0692		0.525332
FU138	9	Ejerslev (Mors)	36.0496			23.5	0.29316
Ash +61	9	Knudeklint (Fur)	36.15	0.02
JH17 9.2	9	Stendal East (Fur)	36.2
FU139	9	Ejerslev (Mors)	36.2105			24.1	0.439984	54.7747
JH17 9.35	9	Stendal East (Fur)	36.35
Ash +62	9	Knudeklint (Fur)	36.36	0.12
FU140	9	Ejerslev (Mors)	36.3714			28.5	0.305588	93.2628
FU141 ash	9	Ejerslev (Mors)	36.4358	0.04
JH17 9.5	9	Stendal East (Fur)	36.5		-26.9248		0.398095
FU142	9	Ejerslev (Mors)	36.5645			12.7	0.102117
FU143	9	Ejerslev (Mors)	36.6933			16.8	0.181091
Ash +63	9	Knudeklint (Fur)	36.7	0.02
FU144 ash	9	Ejerslev (Mors)	36.7416	0.03
Ash +64	9	Knudeklint (Fur)	36.85	0.02
JH17 9.9	9	Stendal East (Fur)	36.9
FU145	9	Ejerslev (Mors)	36.9025			16.8	0.162679
Ash +65	9	Knudeklint (Fur)	37.03	0.02
FU146	9	Ejerslev (Mors)	37.0634			21.1	0.241423
Ash +66	9	Knudeklint (Fur)	37.1	0.01
JH17 10.1	9	Stendal East (Fur)	37.1		-26.8985		0.411136		0.431781	7.79816	11.3525	14.3724		0.65305	-1.82562	0.21281
Ash +67	9	Knudeklint (Fur)	37.21	0.02
FU147	9	Ejerslev (Mors)	37.2243			22.4	0.287839
JH17 10.3	9	Stendal East (Fur)	37.3
FU148	9	Ejerslev (Mors)	37.3048			17.6	0.154443
Ash +68	9	Knudeklint (Fur)	37.4	0.03
JH17 10.5	9	Stendal East (Fur)	37.5		-26.6107		0.499868
Ash +69	9	Knudeklint (Fur)	37.52	0.04
FU150	9	Ejerslev (Mors)	37.6105			10.8	0.129513
Ash +70	9	Knudeklint (Fur)	37.61	0.03
JH17 10.7	9	Stendal East (Fur)	37.7
FU151	9	Ejerslev (Mors)	37.7715			24.9	0.551975	45.1107
Ash +73	9	Knudeklint (Fur)	37.8	0.02
Ash +75	9	Knudeklint (Fur)	37.87	0.03
Ash +76	9	Knudeklint (Fur)	37.92	0.01
FU152	9	Ejerslev (Mors)	37.9324			25.8	0.395945	65.1605
JH17 11.0	9	Stendal East (Fur)	38		-26.9289		0.567404		0.46361	10.0388	13.4401	16.4055		0.440257
Ash +77	9	Knudeklint (Fur)	38.07	0.01
FU153	9	Ejerslev (Mors)	38.1577			31.9	0.418213	76.2768
Ash +78	9	Knudeklint (Fur)	38.2	0.02
FU154 ash	9	Ejerslev (Mors)	38.2221	0.04
JH17 11.3	9	Stendal East (Fur)	38.3
FU155 ash	9	Ejerslev (Mors)	38.383	0.1
Ash +79	9	Knudeklint (Fur)	38.4	0.14
JH17 11.5	9	Stendal East (Fur)	38.5		-27.6046		0.239832
FU156	9	Ejerslev (Mors)	38.5439			34.4	0.333816	103.051
Ash +80	9	Knudeklint (Fur)	38.57	0.06
Ash +81	9	Knudeklint (Fur)	38.75	0.04
FU158	9	Ejerslev (Mors)	38.7692			26.5	0.343728	77.0959
JH17 11.8	9	Stendal East (Fur)	38.8
Ash +82	9	Knudeklint (Fur)	38.87	0.03
Ash +83	9	Knudeklint (Fur)	38.98	0.04
FU159	9	Ejerslev (Mors)	38.9784			16.3	0.20699
JH17 12.0	9	Stendal East (Fur)	39		-27.0269		0.278518		0.580895	17.9226	21.0057	24.2194		0.742972
FU160 ash	9	Ejerslev (Mors)	39.0267	0.03
Ash +84	9	Knudeklint (Fur)	39.04	0.02
FU161	9	Ejerslev (Mors)	39.1071			18.6	0.275296
Ash +85	9	Knudeklint (Fur)	39.14	0.01
Ash +86	9	Knudeklint (Fur)	39.19	0.01
JH17 12.2	9	Stendal East (Fur)	39.2
Ash +87	9	Knudeklint (Fur)	39.25	0.02
FU162 ash	9	Ejerslev (Mors)	39.2681	0.07
Ash +88	9	Knudeklint (Fur)	39.34	0.01
FU163 ash	9	Ejerslev (Mors)	39.3485	0.05
JH17 12.4	9	Stendal East (Fur)	39.4		-26.7414		0.409984
FU164 ash	9	Ejerslev (Mors)	39.4129	0.04
FU165	9	Ejerslev (Mors)	39.5416			21.4	0.367171	58.2834
JH17 12.6	9	Stendal East (Fur)	39.6
FU166 ash	9	Ejerslev (Mors)	39.606	0.04
FU167	9	Ejerslev (Mors)	39.6543			9.5	0.147588
FU168 ash	9	Ejerslev (Mors)	39.7187	0.04
JH17 12.8	9	Stendal East (Fur)	39.8
FU169	9	Ejerslev (Mors)	39.7991			18.3	0.396115	46.1987
FU170 ash	9	Ejerslev (Mors)	39.8635	0.04
Ash +90	9	Knudeklint (Fur)	39.95	0.08
FU171 ash	9	Ejerslev (Mors)	39.9761	0.03
JH17 13.0	9	Stendal East (Fur)	40		-28.2232		0.18599
FU172	9	Ejerslev (Mors)	40.1049			21.4	0.290442
JH17 13.2	9	Stendal East (Fur)	40.2
FU173	9	Ejerslev (Mors)	40.3141			22.7	0.242287
Ash +91	9	Knudeklint (Fur)	40.32	0.03
JH17 13.4	9	Stendal East (Fur)	40.4
FU174	9	Ejerslev (Mors)	40.475			9	0.104495
JH17 13.6	9	Stendal East (Fur)	40.6		-26.6025		0.413636
Ash +92	9	Knudeklint (Fur)	40.61	0.02
Ash +93	9	Knudeklint (Fur)	40.7	0.01
FU175 ash	9	Ejerslev (Mors)	40.7486	0.05
Ash +94	9	Knudeklint (Fur)	40.79	0.04
JH17 13.8	9	Stendal East (Fur)	40.8
FU176	9	Ejerslev (Mors)	40.829			9	0.0657537
FU177 ash	9	Ejerslev (Mors)	40.9417	0.07
JH17 14.0	9	Stendal East (Fur)	41				0.53572		0.582403	18.0218	21.0912	24.3293		0.58056	-1.65137	0.00758241	3.48	0.01	215.8	0.7	79.6	0.2	86.9	0.3	1.04	0.004	0.96	0.0219801
FU282	9	Knudeklint (Fur)	41.0221			13.6	0.777731	17.4868
Ash +98	9	Knudeklint (Fur)	41.09	0.02
FU283	9	Knudeklint (Fur)	41.1831			10	0.206581
Ash +101	9	Knudeklint (Fur)	41.24	0.1
FU284	9	Knudeklint (Fur)	41.344			6.6	0.171281
Ash +102	9	Knudeklint (Fur)	41.46	0.06
FU285	9	Knudeklint (Fur)	41.5049			5	0.187444
FU286	9	Knudeklint (Fur)	41.6337			6.5	0.253259
FU287	9	Knudeklint (Fur)	41.8429			2.4	0.0981225
Ash +108	9	Knudeklint (Fur)	41.86	0.02
Ash +109	9	Knudeklint (Fur)	41.91	0.02
FU288	9	Knudeklint (Fur)	42.0682			8.5	0.175786
Ash +110	9	Knudeklint (Fur)	42.11	0.03
Ash +114	9	Knudeklint (Fur)	42.39	0.12
FU350 ash +114	9	Silstrup (Thy)	42.39	0.12
FU351	9	Silstrup (Thy)	42.4668			17.8	0.689276	25.8242
FU291 ash	9	Knudeklint (Fur)	42.4924	0.04
FU352	9	Silstrup (Thy)	42.5436			25.2	0.984823	25.5883
Ash +118	9	Knudeklint (Fur)	42.71	0.13
Ash +118	9	Silstrup (Thy)	42.71	0.12
FU294	9	Knudeklint (Fur)	42.78			2.4	0.0636576
FU355	9	Silstrup (Thy)	42.825			27.4	0.942272	29.0787
FU295	9	Knudeklint (Fur)	42.88			31.3	0.204288
FU356	9	Silstrup (Thy)	42.94			13.8	0.441988	31.2226
Ash +119	9	Knudeklint (Fur)	42.95	0.03
FU297 ash	9	Knudeklint (Fur)	42.98	0.03		16.7	0.100645
Ash +120	9	Knudeklint (Fur)	43.01	0.03
FU357	9	Silstrup (Thy)	43.055			24.6	0.828369	29.6969
Ash +121	9	Knudeklint (Fur)	43.06	0.05
FU300	9	Knudeklint (Fur)	43.11			27.3	0.192497
FU301	9	Knudeklint (Fur)	43.16			39.7	0.298731
FU358	9	Silstrup (Thy)	43.17			38.7	1.16222	33.2982
FU302	9	Knudeklint (Fur)	43.21			34.4	0.308244	111.6
FU359	9	Silstrup (Thy)	43.285			29	1.03963	27.8944
FU360	9	Silstrup (Thy)	43.4			34.6	0.699287	49.4789
FU361	9	Silstrup (Thy)	43.515			29	0.607307	47.7518
FU362	9	Silstrup (Thy)	43.63			35.7	0.631486	56.5334
FU363	9	Silstrup (Thy)	43.745			26.4	0.498987	52.9071
FU364	9	Silstrup (Thy)	43.86			35.5	0.574663	61.7753
FU365	9	Silstrup (Thy)	43.975			23.3	0.443854	52.4947
FU366 ash	9	Silstrup (Thy)	44.09	0.03
FU367	9	Silstrup (Thy)	44.205			32.3	0.447383	72.1976
FU368	9	Silstrup (Thy)	44.32			33.5	0.56514	59.2774
FU369	9	Silstrup (Thy)	44.435			31.2	0.473801	65.8504
FU370	9	Silstrup (Thy)	44.55			36.9	0.538208	68.5608
FU371	9	Silstrup (Thy)	44.665			40.6	0.76418	53.1289
FU372	9	Silstrup (Thy)	44.78			41.1	0.785232	52.3412
FU373	9	Silstrup (Thy)	44.895			31.8	0.536671	59.2542
FU374 ash	9	Silstrup (Thy)	45.01	0.02
FU375	9	Silstrup (Thy)	45.125			45.2	0.796056	56.7799
FU376	9	Silstrup (Thy)	45.24			49.5	0.8591	57.6185
FU377	9	Silstrup (Thy)	45.355			43.3	1.03457	41.8533
FU378	9	Silstrup (Thy)	45.47			36.6	0.853299	42.8924
FU379	9	Silstrup (Thy)	45.585			29.6	0.305187	96.9896
FU380	9	Silstrup (Thy)	45.7			60.9	0.645384	94.3624
FU381	9	Silstrup (Thy)	45.815			24.5	0.488757	50.1271
FU382	9	Silstrup (Thy)	45.93			21.3	0.72129	29.5304
FU383	9	Silstrup (Thy)	46.045			32.4	0.66185	48.9537
Ash +129	9	Silstrup (Thy)	46.16	0.05
FU385	9	Silstrup (Thy)	46.36			32.4	0.686918	47.1672
Ash +130	9	Silstrup (Thy)	46.46	0.1
FU387	9	Silstrup (Thy)	46.56			14.7	0.593699	24.76
FU388	9	Silstrup (Thy)	46.66			40.7	0.965753	42.1433
FU389 ash	9	Silstrup (Thy)	46.76	0.02
FU390	9	Silstrup (Thy)	46.86			38.6	1.18309	32.6264
FU391	9	Silstrup (Thy)	46.96			54.5	0.784255	69.4927
FU392	9	Silstrup (Thy)	47.06			47.1	0.796942	59.1009
FU393	9	Silstrup (Thy)	47.16			45.5	0.737033	61.734
FU394	9	Silstrup (Thy)	47.26			30	0.417801	71.8045
FU395 ash	9	Silstrup (Thy)	47.36	0.02
FU396	9	Silstrup (Thy)	47.46			45.2	0.705334	64.0832
FU397	9	Silstrup (Thy)	47.56			30.6	0.642684	47.6128
FU398	9	Silstrup (Thy)	47.66			30.1	1.08529	27.7344
Ash +135	9	Silstrup (Thy)	47.96	0.01
FU402	9	Silstrup (Thy)	48.26			23.4	1.81993	12.8577
FU403	9	Silstrup (Thy)	48.36			28.7	1.03318	27.7784
FU404	9	Silstrup (Thy)	48.46			25.5	0.506112	50.3841
FU405	9	Silstrup (Thy)	48.56			21.7	0.369513	58.726
FU406	9	Silstrup (Thy)	48.66			25.7	0.43534	59.0344
FU407	9	Silstrup (Thy)	48.76			31.6	0.502418	62.8958
FU408	9	Silstrup (Thy)	48.86			31	0.52332	59.2371
FU409	9	Silstrup (Thy)	48.96			26.5	0.408901	64.8078
FU410	9	Silstrup (Thy)	49.06			35.3	0.549842	64.2002
Ash +138	9	Silstrup (Thy)	49.16	0.02
FU411	9	Silstrup (Thy)	49.2964			23.5	0.585729	40.121
FU412	9	Silstrup (Thy)	49.4327			30.4	0.524661	57.9422
FU413	9	Silstrup (Thy)	49.5691			58.8	1.31825	44.6047
FU414	9	Silstrup (Thy)	49.7055			49.4	0.573426	86.1489
FU415	9	Silstrup (Thy)	49.8418			67.1	0.815448	82.2861
FU416	9	Silstrup (Thy)	49.9782			43.3	0.690466	62.7113
FU417	9	Silstrup (Thy)	50.1145			43.5	0.864273	50.3313
FU418	9	Silstrup (Thy)	50.2509			41.5	0.919909	45.1132
FU419	9	Silstrup (Thy)	50.3873			41.1	0.87099	47.1877
FU420	9	Silstrup (Thy)	50.5236			50.6	0.729945	69.3203
Ash +140	9	Silstrup (Thy)	50.66	0.005
FU422	9	Silstrup (Thy)	50.76			42.3	0.515028	82.1315
FU423	9	Silstrup (Thy)	50.86			43.3	0.639403	67.7194
FU424	9	Silstrup (Thy)	50.96			40.6	1.00164	40.5336
FU425	9	Silstrup (Thy)	51.06			40.5	0.933073	43.405
	9	Silstrup (Thy)	51.51
	9	Silstrup (Thy)	52
	9	Silstrup (Thy)	52.01
