# Supplementary material for: Tracing North Atlantic volcanism and seaway connectivity across the Paleocene–Eocene Thermal Maximum (PETM)
Source: Copernicus journal article supplement (doi:10.5194/cp-19-1623-2023), 2023-08-08
Supplement: Supplementary file 2 [file cp-19-1623-2023-supplement.zip]

Archive with 2 entries (2 files):
- cp-19-1623-2023-supplement-title-page.pdf
- Supplementary Data - Fur paper.xlsx
